# Supplementary material for: Machine learning approaches to predict age from accelerometer records of physical activity at biobank scale
Source: PubMed Central journal article supplement (PMC9931315; doi:10.1371/journal.pdig.0000176), 2023-01-24

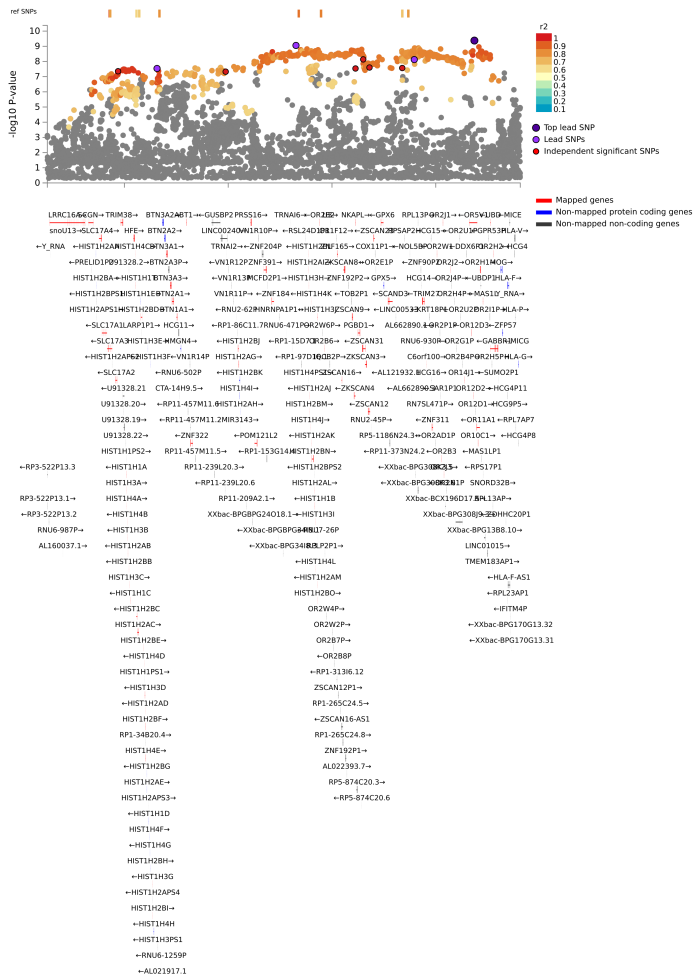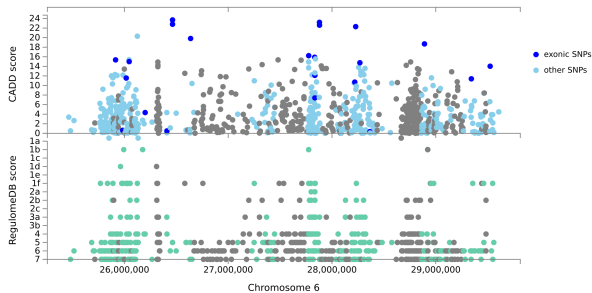

Supplement: pdig.0000176.s005.pdf [file pdig.0000176.s005.pdf]
